# Supplementary material for: Broadband Terahertz Photonic Integrated Circuit with Integrated Active Photonic Devices
Source: MDPI journal article supplement (doi:10.3390/photonics8110492), 2021-11-03
Supplement: s1 [file s1]

Archive with 1 entries (1 files):
- photonics-1421713-supplementary.pdf
